# Supplementary material for: Video Consultations for Older Adults With Multimorbidity During the COVID-19 Pandemic: Protocol for an Exploratory Qualitative Study
Source: PubMed Central journal article supplement (PMC7592461; doi:10.2196/22679), 2020-10-26
Supplement: resprot_v9i10e22679_app1.pdf [file resprot_v9i10e22679_app1.pdf]

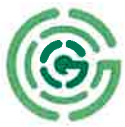

## APPENDIX A

### Reviewers' Comments

1. The application was reviewed by four independent reviewers and their comments are compiled below.

| Review Criteria                                                                                                                                                                                                                                                                                                                                                                                                                                                                                                                                                                                                                                                                                                                                       | Average Score |
|-------------------------------------------------------------------------------------------------------------------------------------------------------------------------------------------------------------------------------------------------------------------------------------------------------------------------------------------------------------------------------------------------------------------------------------------------------------------------------------------------------------------------------------------------------------------------------------------------------------------------------------------------------------------------------------------------------------------------------------------------------|---------------|
| Relevance<br>(0.0 to 10.0)                                                                                                                                                                                                                                                                                                                                                                                                                                                                                                                                                                                                                                                                                                                            | 9.00          |
| Repercussions<br>(0.0 to 20.0)                                                                                                                                                                                                                                                                                                                                                                                                                                                                                                                                                                                                                                                                                                                        | 15.50         |
| Rigor<br>(0.0 to 20.0)                                                                                                                                                                                                                                                                                                                                                                                                                                                                                                                                                                                                                                                                                                                                | 15.50         |
| Readiness<br>(0.0 to 10.0)                                                                                                                                                                                                                                                                                                                                                                                                                                                                                                                                                                                                                                                                                                                            | 9.00          |
| Reasonableness<br>(0.0 to 10.0)                                                                                                                                                                                                                                                                                                                                                                                                                                                                                                                                                                                                                                                                                                                       | 9.00          |
| Total Score<br>(Max = 70)                                                                                                                                                                                                                                                                                                                                                                                                                                                                                                                                                                                                                                                                                                                             | 58.00         |
| Comments                                                                                                                                                                                                                                                                                                                                                                                                                                                                                                                                                                                                                                                                                                                                              |               |
| <ol style="list-style-type: none"><li>1. Well written with a comprehensive view from micro to macro level. Good translation potential Applying IoT method is innovation but need social scientist on team familiar with topic of social isolation</li><li>2. Did not present any evidence on efficacy of video consultations in disease management.</li><li>3. Research Question 3 can be more clearly framed</li><li>4. Given the inductive nature of analysis, good to state upfront how the NASSS conceptual framework will be applied.</li><li>5. Self-select group of older adults &gt;60 years who can use ZOOM which may not reflect the general population. That is an inevitable weakness of the study which must be acknowledged.</li></ol> |               |
